1 **Multimorbidity Patterns of Chronic Diseases Among Adults in Rural North**  
2 **China.**

3 Shuai Tang<sup>1</sup>, Yanxing Li<sup>1</sup>, Meili Niu<sup>1</sup>, Zijing Qi<sup>1</sup>, Tianyou Hao<sup>2</sup>, Hongmei Yang<sup>3</sup>,  
4 Maoyi Tian<sup>4,5</sup>, Xinyi Zhang<sup>5</sup>, Xiangxian Feng<sup>3</sup>, Zhifang Li<sup>1,3#</sup>

5

6 <sup>1</sup> School of Public Health, Shanxi Medical University, Taiyuan 030001, China.

7 <sup>2</sup> Department of Prevention and Health Care, Affiliated Heping hospital of Changzhi  
8 medical college, Changzhi, 046000, China.

9 <sup>3</sup> Department of Public Health and Prevention, Changzhi Medical College, Changzhi  
10 046000, China.

11 <sup>4</sup> The George Institute for Global Health, University of New South Wales, Australia.

12 <sup>5</sup> School of Public Health, Harbin Medical University, Harbin 150081, China.

13

14 **#Corresponding author:** Zhifang Li,

15 School of Public Health, Shanxi Medical University.

16 No.56 Xinjian South Road, Yingze district, Taiyuan 030001, China.

17 Tel: 18636517556

18 E-mail: lzfmuzi@163.com

19

## 20 **Abstract**

---

### 21 **Background**

22 The incidence of chronic diseases is increasing, especially in rural areas, where younger patients  
23 often exhibit multimorbidity. Understanding multimorbidity in rural adults can guide the  
24 development of targeted management strategies for chronic diseases.

### 25 **Methods**

26 This cross-sectional study was conducted in rural North China using whole cluster stratified  
27 random sampling to select two counties in Shanxi Province. A total of 2,208 participants aged  
28 30 years or older from 80 villages were enrolled, stratified by gender and age. Data collection  
29 involved questionnaires on socio-demographic characteristics, lifestyle, and disease history,  
30 along with physical measurements such as height, weight, and waist circumference.

### 31 **Results**

32 Among the 2,208 participants, 58.11% were aged 30-59 years, and 52.17% were female. The  
33 prevalence of chronic diseases was 66.53%, with a multimorbidity rate of 32.47%. The most  
34 common conditions were hypertension (43.21%), chronic digestive diseases (11.82%), and  
35 stroke (10.19%). Multimorbidity was more prevalent in those aged  $\geq 60$  years compared to the  
36 30-59 age group (47.68% vs. 21.51%,  $P < 0.05$ ), with no significant gender differences.  
37 Hypertension was present in 78.52% of disease patterns, with common dyads being  
38 hypertension & stroke (7.47%), hypertension & heart disease (6.25%), and hypertension &  
39 diabetes mellitus (6.11%). In the 30-59 age group, hypertension & chronic digestive disease  
40 (3.82%) were most prevalent, while for those aged  $\geq 60$  years and males, hypertension & stroke  
41 were most common (12.65% and 9.47%, respectively). Among females, the most frequent dyad  
42 was hypertension & arthritis (8.16%).

### 43 **Conclusion**

44 Chronic diseases and multimorbidity are prevalent in rural North China, primarily driven by  
45 hypertension. Multimorbidity patterns differ by age and gender, indicating the need for targeted  
46 prevention and treatment strategies.

47 **Keywords:** China, rural, adults, multimorbidity.

48

## 49 **Background**

---

50 With the aging of the population, the prevalence of chronic diseases continues to rise, and the  
51 coexistence of multiple chronic diseases has become increasingly common [1, 2]. The World  
52 Health Organization (WHO) defines the coexistence of two or more chronic health problems in  
53 the same individual as “multimorbidity” [3]. Globally, the population aged 65 years and older  
54 increased from 6% to 9% between 1990 and 2019 and is projected to increase to 16% by 2050[4].  
55 In 2023, China's population aged 60 years and over reached 297 million, accounting for 21.1%  
56 of the total population, and is projected to exceed 400 million by 2035, accounting for more  
57 than 30% of the total population[5]. According to the China Elderly Health Report (2024), the  
58 prevalence of chronic diseases such as hypertension, diabetes mellitus, and dyslipidemia has  
59 worsened over the past decade, with the prevalence of diabetes mellitus surging by 35%. In the  
60 Chinese adult population, the prevalence of multimorbidity has reached 36.1%, and this  
61 prevalence continues to show an increasing trend[6]. Patients with multimorbidity often require  
62 multiple medications, which not only increases the complexity of treatment and care but also  
63 leads to a significant rise in adverse events and healthcare costs[7, 8]. Of particular concern, rural  
64 areas in China have become the hardest hit by multimorbidity due to a severe lack of health  
65 resources and a general lack of health awareness among the population[9].

66 Currently, research on multimorbidity predominantly targets urban communities and older  
67 adults aged 60 years and above, while limited attention has been given to multimorbidity  
68 patterns in rural populations, particularly younger adults[6]. This study focuses on individuals  
69 aged 30 years or older in rural areas of North China, aiming to investigate the prevalence of  
70 chronic diseases. By collecting real data on multimorbidity in resource-constrained rural areas,  
71 we aim to offer a scientific basis and practical recommendations for prevention and  
72 management strategies.

73

74

75

## 76 **Methods**

---

### 77 **Research subjects**

78 This cross-sectional study was conducted between February and December 2023 in rural regions  
79 of North China. A whole-cluster stratified random sampling method was employed to select two  
80 counties in Shanxi Province, Northern China. Forty villages were subsequently selected from  
81 each county using whole-cluster sampling. At least 25 participants were selected from each  
82 village, stratified by gender (male/female) and age groups (30–59 years and  $\geq 60$  years). Inclusion  
83 criteria included being aged  $\geq 30$  years and a permanent resident of the selected village.  
84 Exclusion criteria comprised pregnant women, individuals unable to provide informed consent,  
85 unwilling participants, those unable to communicate effectively, and individuals unable to  
86 complete blood and urine sample collection. Ethical approval was obtained from the Ethics  
87 Committee of Harbin Medical University (NO. HMUIRB2022005PRE), and all participants  
88 provided written informed consent. A total of 2,208 participants were included in the study.

### 89 **Research methodology**

90 All study participants were required to complete a questionnaire and undergo a physical  
91 examination. The questionnaires were derived from the standardized Assessment of  
92 Multimorbidity in Primary Health Care (MAQ-PC) tool<sup>[10]</sup>, covering socio-demographic  
93 characteristics, lifestyle habits, and psychosocial factors, while collecting data on variables such  
94 as gender, age, marital status, educational level, household size, annual family income, smoking  
95 status, alcohol consumption, and physical activity. Alcohol consumption was assessed via the  
96 Alcohol Use Disorders Identification Test (AUDIT), where a score of  $\geq 8$  indicated hazardous or  
97 harmful drinking behavior <sup>[11]</sup>, Physical activity levels were assessed using the International  
98 Physical Activity Questionnaire (IPAQ), classifying participants into low, moderate, or high  
99 physical activity categories <sup>[12]</sup>.

100 Physical examination included height, weight, waist circumference, and blood pressure. The  
101 measurement process adhered to the Chinese population health monitoring anthropometric  
102 method standard (WS/T424-2013). For blood pressure measurement, a calibrated Omron HEM-

103 7036 electronic sphygmomanometer was used. Two to three measurements of participants' sitting  
104 upper arm blood pressure were recorded and averaged. Waist circumference  $\geq 90$  cm in males  
105 and  $\geq 85$  cm in females was considered indicative of central obesity<sup>[13]</sup>, while blood pressure  
106  $\geq 130/80$  mm Hg was classified as hypertension<sup>[14]</sup>. Body mass index (BMI) was categorized as  
107  $\leq 24$  kg/m<sup>2</sup> for normal weight, 24–28 kg/m<sup>2</sup> for overweight, and  $\geq 28$  kg/m<sup>2</sup> for obesity.

## 108 **Methods of Disease Diagnosis and Types**

109 Disease information in this study was self-reported by the participants and included 19 chronic  
110 conditions, such as hypertension (HTN), stroke (CVA), heart disease (HD), arthritis (RA),  
111 chronic back pain (CBP), osteoporosis (OP), tuberculosis (TB), chronic lung disease (COPD),  
112 chronic digestive disease (CDD), diabetes mellitus (DM), thyroid disease (TD), eye disease  
113 (EyeD), ear disease (EarD), epilepsy (EP), anxiety (ANX), depression (MDD), dementia (DEM),  
114 chronic kidney disease (CKD), and cancer (CA).

## 115 **Sample Size Calculation**

116 The results of a meta-analysis indicated that, over the past 20 years, the prevalence of adult  
117 multimorbidity in China was 25.4% (95% CI: 15.1%, 35.7%)<sup>[15]</sup>. PASS15.0 software was used to  
118 determine the required sample size. A lower prevalence rate of 15.1% was selected, with a two-  
119 sided  $\alpha$  of 0.05 and a tolerance error of 1.51%. The Simple Asymptotic method was applied to  
120 compute a maximum required sample size of 2160 cases. The inclusion of 2208 participants  
121 exceeded the calculated sample size requirement.

## 122 **Statistical Analysis**

123 Data were independently entered by two individuals and subsequently checked for consistency to  
124 create the final database. Statistical analyses were performed using R 4.2.1 software. Count data  
125 were described as frequencies, and between-group comparisons were conducted using Pearson's  
126 chi-square test, Fisher's exact test, or the Kruskal-Wallis test. The multimorbidity network graph  
127 was visualized using Gephi 0.10.1 software. Graph density was defined as the ratio of the actual  
128 number of edges to the maximum possible number of edges, and the mean degree was calculated  
129 as the ratio of the sum of the degrees of all nodes (i.e., number of edges) to the number of nodes  
130 (i.e., disease types). In the network graph (**Fig.1**): Nodes represent different chronic disease types,

131 with their size proportional to the disease prevalence. Nodes corresponding to diseases within the  
132 same system are assigned the same color. The thickness of the edges is proportional to the  
133 frequency of multimorbidity. Nodes are arranged counterclockwise according to their degree (the  
134 number of connected edges). All statistical analyses were deemed significant at  $P < 0.05$ .

## 135 **Results**

---

### 136 **Basic Information**

137 A total of 2208 adults were included in this study. Among them, 1283 (58.11%) were aged 30-59  
138 years, and 1152 (52.17%) were female. Compared to the 30-59 years age group, individuals aged  
139  $\geq 60$  years exhibited trends of lower marriage rates, literacy levels, family size, annual household  
140 income, smoking rates, high-risk drinking, and high-intensity physical activity, but higher rates of  
141 central obesity and systolic blood pressure  $\geq 130$  mm Hg. Compared to males, females exhibited  
142 higher literacy levels, higher annual household income, but lower rates of smoking, high-risk  
143 drinking, and systolic blood pressure  $\geq 130$  mm Hg. The proportion of married women and those  
144 engaging in high-intensity physical activity were also higher than that of males (**Table 1**).

**Table1. Demographic characteristics of adult residents in rural areas of North China (N = 2208)**

| Characteristic                      | Age(n/%)     |               | Gender(n/%)  |                | Total(n/%)   |
|-------------------------------------|--------------|---------------|--------------|----------------|--------------|
|                                     | 30-59 y      | ≥60 y         | Male         | Female         |              |
| Total                               | 1283(58.11)  | 925(41.89)    | 1056 (47.83) | 1152 (52.17)   | 2208(100)    |
| Marriage status                     |              |               |              |                |              |
| Married                             | 1191 (92.83) | 774 (83.68) * | 917 (86.84)  | 1048 (90.97) * | 1965 (88.99) |
| Widowed                             | 31 (2.42)    | 133 (14.38)   | 72 (6.82)    | 92 (7.99)      | 164 (7.43)   |
| Others#                             | 61(4.76)     | 18(1.94)      | 67(6.34)     | 12(1.04)       | 79(3.58)     |
| Educational level                   |              |               |              |                |              |
| Primary or less                     | 491 (38.27)  | 523 (56.54) * | 392 (37.12)  | 622 (53.99) *  | 1014 (45.92) |
| Secondary                           | 654 (50.97)  | 312 (33.73)   | 524 (49.62)  | 442 (38.37)    | 966 (43.75)  |
| High school and above               | 138 (10.76)  | 90(9.73)      | 140 (13.26)  | 88 (7.64)      | 228 (10.33)  |
| Number of family members            |              |               |              |                |              |
| 1-2                                 | 296 (23.07)  | 501 (54.16) * | 402 (38.07)  | 395 (34.29)    | 797 (36.10)  |
| 3-4                                 | 614 (47.86)  | 139 (15.03)   | 357 (33.81)  | 396 (34.38)    | 753 (34.10)  |
| ≥5                                  | 373 (29.07)  | 285 (30.81)   | 297 (28.12)  | 361 (31.34)    | 658 (29.80)  |
| Annual family income (Chinese Yuan) |              |               |              |                |              |
| <20000                              | 464 (36.17)  | 633 (68.43) * | 528 (50.00)  | 569 (49.39) *  | 1097 (49.68) |
| 20000-50000                         | 608 (47.39)  | 221 (23.89)   | 376 (35.61)  | 453 (39.32)    | 829 (37.55)  |
| ≥50000                              | 211 (16.45)  | 71 (7.68)     | 152 (14.39)  | 130 (11.28)    | 282 (12.77)  |
| Smoke status                        |              |               |              |                |              |
| Never smoked                        | 828 (64.54)  | 621 (67.14) * | 311 (29.45)  | 1138 (98.78) * | 1449 (65.62) |
| Used to smoke                       | 40 (3.12)    | 68 (7.35)     | 106 (10.04)  | 2 (0.17)       | 108 (4.89)   |
| Now smoking                         | 415 (32.35)  | 236 (25.51)   | 639 (60.51)  | 12 (1.04)      | 651 (29.48)  |
| Drinking alcohol (using AUDIT)      |              |               |              |                |              |
| Low-risk drinking                   | 936 (72.95)  | 755 (81.62) * | 569 (53.88)  | 1122 (97.40) * | 1691 (76.59) |
| High-risk drinking                  | 347 (27.05)  | 170 (18.38)   | 487 (46.12)  | 30 (2.60)      | 517 (23.41)  |
| Physical activity (using IPAQ)      |              |               |              |                |              |
| Low intensity                       | 128 (9.98)   | 120 (12.97) * | 118 (11.17)  | 130 (11.28) *  | 248 (11.23)  |



|                          |             |              |             |              |              |
|--------------------------|-------------|--------------|-------------|--------------|--------------|
| Medium intensity         | 158 (12.31) | 157 (16.97)  | 182 (17.23) | 133 (11.55)  | 315 (14.27)  |
| High intensity           | 997 (77.71) | 648 (70.05)  | 756 (71.59) | 889 (77.17)  | 1645 (74.50) |
| BMI (kg/m <sup>2</sup> ) |             |              |             |              |              |
| ≤24                      | 433 (33.75) | 383 (41.41)* | 406 (38.45) | 410 (35.59)  | 816 (36.96)  |
| 24-28                    | 547 (42.63) | 364 (39.35)  | 427 (40.44) | 484 (42.01)  | 911 (41.26)  |
| ≥28                      | 303 (23.62) | 178 (19.24)  | 223 (21.12) | 258 (22.40)  | 481 (21.78)  |
| Waist circumference      |             |              |             |              |              |
| Normal                   | 479 (37.33) | 287 (31.03)* | 386 (36.55) | 380 (32.99)  | 766 (34.69)  |
| Central obesity          | 804 (62.67) | 638 (68.97)  | 670 (63.45) | 772 (67.01)  | 1442 (65.31) |
| SBP (mm Hg)              |             |              |             |              |              |
| <130                     | 660 (51.44) | 322 (34.81)* | 445 (42.14) | 537 (46.61)* | 982 (44.47)  |
| ≥130                     | 623 (48.56) | 603 (65.19)  | 611 (57.86) | 615 (53.39)  | 1226 (55.53) |
| DBP (mm Hg)              |             |              |             |              |              |
| <80                      | 436 (33.98) | 398 (43.03)* | 340 (32.20) | 494 (42.88)* | 834 (37.77)  |
| ≥80                      | 847 (66.02) | 527 (56.97)  | 716 (67.80) | 658 (57.12)  | 1374 (62.23) |

\*Statistically significant at 5 level.

#Others denotes divorced/separated/unmarried.

145

#### 146 Prevalence of Chronic Diseases

147 The prevalence of chronic diseases was 66.53%. The most common conditions were  
 148 hypertension (HTN, 43.21%), coronary artery disease (CDD, 11.82%), cerebrovascular accident  
 149 (CVA, 10.19%), rheumatoid arthritis (RA, 10.10%), and diabetes mellitus (DM, 9.78%). The  
 150 prevalence was significantly higher among individuals aged ≥60 years compared to those aged  
 151 30-59 years (82.27% vs. 55.18%, P<0.05). There was no significant difference in prevalence  
 152 between males and females (64.96% vs. 67.97%, P>0.05) (Table 2).

**Table2. The prevalence of 19 chronic diseases in 2208 adults by sex and age**

| Chronic diseases | Age(n/%)       |             | Gender(n/%)  |                | Total(n/%)<br>(n=2208) |
|------------------|----------------|-------------|--------------|----------------|------------------------|
|                  | 30-59y(n=1283) | ≥60y(n=925) | Male(n=1056) | Female(n=1152) |                        |

|       |            |             |            |             |             |
|-------|------------|-------------|------------|-------------|-------------|
| HTN   | 411(32.03) | 543(58.70)* | 448(42.42) | 506(43.92)  | 954(43.21)  |
| CDD   | 129(10.05) | 132(14.27)* | 108(10.23) | 153(13.28)* | 261(11.82)  |
| CVA   | 70(5.46)   | 155(16.76)* | 140(13.26) | 85(7.38)*   | 225(10.19)  |
| RA    | 98(7.64)   | 125(13.51)* | 60(5.68)   | 163(14.15)* | 223(10.10)  |
| DM    | 80(6.24)   | 136(14.70)* | 88(8.33)   | 128(11.11)* | 216(9.78)   |
| HD    | 62(4.83)   | 138(14.92)* | 104(9.85)  | 96(8.33)    | 200(9.06)   |
| CBP   | 72(5.61)   | 68(7.35)    | 61(5.78)   | 79(6.86)    | 140(6.34)   |
| EyeD  | 17(1.33)   | 76(8.22)*   | 33(3.12)   | 60(5.21)*   | 93(4.21)    |
| COPD  | 35(2.73)   | 50(5.41)*   | 49(4.64)   | 36(3.12)    | 85(3.85)    |
| EarD  | 24(1.87)   | 38(4.11)*   | 39(3.69)   | 23(2.00)*   | 62(2.81)    |
| CA    | 28(2.18)   | 33(3.57)    | 19(1.80)   | 42(3.65)*   | 61(2.76)    |
| TD    | 34(2.65)   | 26(2.81)    | 13(1.23)   | 47(4.08)*   | 60(2.72)    |
| OP    | 25(1.95)   | 32(3.46)*   | 20(1.89)   | 37(3.21)    | 57(2.58)    |
| CKD   | 18(1.40)   | 14(1.51)    | 18(1.70)   | 14(1.22)    | 32(1.45)    |
| TB    | 12(0.94)   | 9(0.97)     | 6(0.57)    | 15(1.30)    | 21(0.95)    |
| EP    | 8(0.62)    | 2(0.22)     | 7(0.66)    | 3(0.26)     | 10(0.45)    |
| ANX   | 6(0.47)    | 2(0.22)     | 2(0.19)    | 6(0.52)     | 8(0.36)     |
| DEM   | 1(0.08)    | 6(0.65)*    | 5(0.47)    | 2(0.17)     | 7(0.32)     |
| MDD   | 6(0.47)    | 1(0.11)     | 2(0.19)    | 5(0.43)     | 7(0.32)     |
| Total | 708(55.18) | 761(82.27)* | 686(64.96) | 783(67.97)  | 1469(66.53) |

---

\*Statistically significant at 5% level.

153

154 **Status of multimorbidity**

155 The prevalence of local multimorbidity (defined as having two or more chronic diseases  
 156 simultaneously) was 32.47%. Multimorbidity was more common in people aged  $\geq 60$  years than  
 157 in those aged 30-59 years (47.68% vs. 21.51%,  $P < 0.05$ ). No statistically significant difference in  
 158 multimorbidity prevalence was found between males and females (30.87% vs. 33.94%,  $P > 0.05$ ).  
 159 Among the 717 cases of multimorbidity, more than 55% had two concurrent diseases,  
 160 approximately one-quarter had three diseases, and nearly one-fifth had four or more diseases.

161 The number of chronic conditions reached up to 10 in some cases. Hypertension (HTN) was the  
162 most common comorbidity, affecting 78.52% of individuals (Table 3).

**Table3. The distribution of 19 chronic conditions among 717 cases with multimorbidity, stratified by age and gender.**

| Chronic diseases                    | Age(n/%)   |             | Gender(n/%) |             | Total(n/%) |
|-------------------------------------|------------|-------------|-------------|-------------|------------|
|                                     | 30-59y     | ≥60y        | Male        | Female      |            |
| <b>Different number of diseases</b> |            |             |             |             |            |
| Only two                            | 178(64.49) | 226(51.25)* | 201(61.66)  | 203(51.92)* | 404(56.35) |
| Only three                          | 62(22.46)  | 112(25.40)* | 75(23.01)   | 99(25.32)*  | 174(24.27) |
| Four or above                       | 36(13.04)  | 103(23.36)* | 50(15.34)   | 89(22.76)*  | 139(19.39) |
| Total                               | 276(21.51) | 441(47.68)* | 326(30.87)  | 391(33.94)  | 717(32.47) |
| <b>Types of disease</b>             |            |             |             |             |            |
| HTN                                 | 200(72.46) | 363(82.31)* | 264(80.98)  | 299(76.47)  | 563(78.52) |
| CVA                                 | 54(19.57)  | 137(31.07)* | 114(34.97)  | 77(19.69)*  | 191(26.64) |
| CDD                                 | 86(31.16)  | 105(23.81)* | 77(23.62)   | 114(29.16)  | 191(26.64) |
| RA                                  | 72(26.09)  | 113(25.62)  | 51(15.64)   | 134(34.27)* | 185(25.80) |
| HD                                  | 47(17.03)  | 124(28.12)* | 85(26.07)   | 86(21.99)   | 171(23.85) |
| DM                                  | 49(17.75)  | 120(27.21)* | 62(19.02)   | 107(27.37)* | 169(23.57) |
| CBP                                 | 54(19.57)  | 55(12.47)*  | 50(15.34)   | 59(15.09)   | 109(15.20) |
| EyeD                                | 14(5.07)   | 66(14.97)*  | 27(8.28)    | 53(13.55)*  | 80(11.16)  |
| COPD                                | 25(9.06)   | 40(9.07)    | 33(10.12)   | 32(8.18)    | 65(9.07)   |
| OP                                  | 23(8.33)   | 31(7.03)    | 18(5.52)    | 36(9.21)    | 54(7.53)   |
| EarD                                | 14(5.07)   | 35(7.94)    | 32(9.82)    | 17(4.35)*   | 49(6.83)   |
| TD                                  | 17(6.16)   | 23(5.22)    | 9(2.76)     | 31(7.93)*   | 40(5.58)   |
| CA                                  | 12(4.35)   | 24(5.44)    | 8(2.45)     | 28(7.16)*   | 36(5.02)   |
| CKD                                 | 13(4.71)   | 12(2.72)    | 15(4.60)    | 10(2.56)    | 25(3.49)   |
| TB                                  | 10(3.62)   | 7(1.59)     | 6(1.84)     | 11(2.81)    | 17(2.37)   |
| ANX                                 | 6(2.17)    | 2(0.45)     | 2(0.61)     | 6(1.53)     | 8(1.12)    |
| MDD                                 | 6(2.17)    | 1(0.23)*    | 2(0.61)     | 5(1.28)     | 7(0.98)    |

|     |         |         |         |         |         |
|-----|---------|---------|---------|---------|---------|
| DEM | 0(0.0)  | 6(1.36) | 4(1.23) | 2(0.51) | 6(0.84) |
| EP  | 2(0.72) | 2(0.45) | 3(0.92) | 1(0.26) | 4(0.56) |

\*Statistically significant at 5% level.

163

#### 164 Analysis of Chronic Disease Multimorbidity Patterns

165 The top three dyad disease patterns in this study were HTN&CVA (7.47%), HTN&HD (6.25%),  
 166 and HTN&DM (6.11%). HTN&HD&CVA (1.77%) was the most common triad disease pattern.  
 167 In the 30-59-year-old group, the top three dyad disease patterns were HTN&CDD (3.82%),  
 168 HTN&CVA (3.74%), and HTN&RA (3.43%). Among those aged  $\geq 60$  years, HTN&CVA  
 169 (12.65%), HTN&HD (11.46%), and HTN&DM (10.38%) were the most common patterns, as  
 170 shown in **Table 4**. For males, the most common dyad disease patterns were HTN&CVA (9.47%),  
 171 HTN&HD (6.53%), and HTN&CDD (4.73%). For females, HTN&RA (8.16%), HTN&DM  
 172 (7.64%), and HTN&CDD (6.77%) were the most prevalent, as shown in **Table 5**.

173 In the network graph of the total population (**Fig. 1a**), 137 contiguous edges were observed, with  
 174 a graph density of 0.80 and a mean degree of 14.42. In the network graph of the 30-59-year-old  
 175 population (**Fig. 1b**), 103 contiguous edges were observed, with a graph density of 0.60 and a  
 176 mean degree of 10.84. In the network graph for those aged  $\geq 60$  years (**Fig. 1c**), 125 edges were  
 177 observed, with a graph density of 0.73 and a mean degree of 13.16. The  $\geq 60$ -year-old group  
 178 exhibited greater graph density and thicker edges. In the male population network graph (**Fig.**  
 179 **1d**), 108 contiguous edges were observed, with a graph density of 0.63 and a mean degree of  
 180 11.37. In the female population network graph (**Fig. 1e**), 122 edges were observed, with a higher  
 181 graph density of 0.71 and a mean degree of 12.84. Females exhibited greater graph density and  
 182 thicker edges compared to males.

**Table 4. Top ten frequent unique combination clusters with multimorbidity, stratified by age.**

| Rank                      | 30-59y(n=1283) |       | $\geq 60$ y(n=925) |       | Total(n=2208) |       |
|---------------------------|----------------|-------|--------------------|-------|---------------|-------|
|                           | Combination    | n (%) | Combination        | n (%) | Combination   | n (%) |
| <b>Dyads of morbidity</b> |                |       |                    |       |               |       |

|    |            |          |            |            |            |           |
|----|------------|----------|------------|------------|------------|-----------|
| 1  | HTN & CDD  | 49(3.82) | HTN & CVA  | 117(12.65) | HTN & CVA  | 165(7.47) |
| 2  | HTN & CVA  | 48(3.74) | HTN & HD   | 106(11.46) | HTN & HD   | 138(6.25) |
| 3  | HTN & RA   | 44(3.43) | HTN & DM   | 96(10.38)  | HTN & DM   | 135(6.11) |
| 4  | HTN & DM   | 39(3.04) | HTN & RA   | 84(9.08)   | HTN & RA   | 128(5.8)  |
| 5  | HTN & HD   | 32(2.49) | HTN & CDD  | 79(8.54)   | HTN & CDD  | 128(5.8)  |
| 6  | HTN & CBP  | 26(2.03) | HTN & EyeD | 50(5.41)   | HTN & CBP  | 65(2.94)  |
| 7  | RA & CDD   | 25(1.95) | HTN & CBP  | 39(4.22)   | HTN & EyeD | 58(2.63)  |
| 8  | CDD & CBP  | 22(1.71) | HD & CVA   | 37(4)      | RA & CDD   | 54(2.45)  |
| 9  | RA & CBP   | 17(1.33) | CDD & HD   | 33(3.57)   | HTN&COPD   | 48(2.17)  |
| 10 | HTN & COPD | 16(1.25) | DM & CVA   | 33(3.57)   | CDD & HD   | 45(2.04)  |

### Triads of morbidity

|    |             |          |             |          |             |          |
|----|-------------|----------|-------------|----------|-------------|----------|
| 1  | HTN&RA&CDD  | 12(0.94) | HTN&HD&CVA  | 33(3.57) | HTN&HD&CVA  | 39(1.77) |
| 2  | HTN&CDD&CBP | 10(0.78) | HTN&DM&CVA  | 27(2.92) | HTN&DM&CVA  | 31(1.4)  |
|    | HTN&CDD&    |          |             |          |             |          |
| 3  | CVA         | 10(0.78) | HTN&RA&CVA  | 25(2.7)  | HTN&CDD&HD  | 31(1.4)  |
| 4  | HTN&RA&CBP  | 9(0.7)   | HTN&CDD&HD  | 24(2.59) | HTN&RA&CDD  | 30(1.36) |
| 5  | HTN&RA&DM   | 7(0.55)  | HTN&DM&HD   | 24(2.59) | HTN&RA&CVA  | 30(1.36) |
| 6  | HTN&CDD&HD  | 7(0.55)  | HTN&RA&DM   | 21(2.27) | HTN&CDD&CBP | 29(1.31) |
| 7  | RA&CDD&CBP  | 7(0.55)  | HTN&CDD&CBP | 19(2.05) | HTN&RA&DM   | 28(1.27) |
| 8  | HTN&RA&HD   | 6(0.47)  | HTN&RA&CBP  | 19(2.05) | HTN&RA&CBP  | 28(1.27) |
| 9  | HTN&HD&CVA  | 6(0.47)  | HTN&RA&HD   | 19(2.05) | HTN&DM&HD   | 27(1.22) |
| 10 | HTN&DM&CDD  | 6(0.47)  | HTN&RA&CDD  | 18(1.95) | HTN&RA&HD   | 25(1.13) |

**Table 5. Top ten frequent unique combination clusters with multimorbidity, stratified by gender.**

| Rank                       | Male(n=1056)    |           | Female(n=1152)  |          | Total(n=2208)   |           |
|----------------------------|-----------------|-----------|-----------------|----------|-----------------|-----------|
|                            | Combination     | n (%)     | Combination     | n (%)    | Combination     | n (%)     |
| <b>Dyads of morbidity</b>  |                 |           |                 |          |                 |           |
| 1                          | HTN & CVA       | 100(9.47) | HTN & RA        | 94(8.16) | HTN & CVA       | 165(7.47) |
| 2                          | HTN & HD        | 69(6.53)  | HTN & DM        | 88(7.64) | HTN & HD        | 138(6.25) |
| 3                          | HTN & CDD       | 50(4.73)  | HTN & CDD       | 78(6.77) | HTN & DM        | 135(6.11) |
| 4                          | HTN & DM        | 47(4.45)  | HTN & HD        | 69(5.99) | HTN & RA        | 128(5.8)  |
| 5                          | HTN & RA        | 34(3.22)  | HTN & CVA       | 65(5.64) | HTN & CDD       | 128(5.8)  |
| 6                          | HTN & CBP       | 29(2.75)  | HTN & EyeD      | 40(3.47) | HTN & CBP       | 65(2.94)  |
| 7                          | HTN & COPD      | 26(2.46)  | RA & CDD        | 39(3.39) | HTN & EyeD      | 58(2.63)  |
| 8                          | HD & CVA        | 24(2.27)  | HTN & CBP       | 36(3.13) | RA & CDD        | 54(2.45)  |
| 9                          | HTN & EarD      | 22(2.08)  | RA & DM         | 32(2.78) | HTN & COPD      | 48(2.17)  |
| 10                         | CDD & CBP       | 19(1.8)   | CDD & HD        | 27(2.34) | CDD & HD        | 45(2.04)  |
| <b>Triads of morbidity</b> |                 |           |                 |          |                 |           |
| 1                          | HTN & HD & CVA  | 21(1.99)  | HTN & RA & CDD  | 24(2.08) | HTN & HD & CVA  | 39(1.77)  |
| 2                          | HTN & DM & CVA  | 15(1.42)  | HTN & RA & DM   | 24(2.08) | HTN & DM & CVA  | 31(1.4)   |
| 3                          | HTN & CDD & HD  | 12(1.14)  | HTN & CDD & HD  | 19(1.65) | HTN & CDD & HD  | 31(1.4)   |
| 4                          | HTN & DM & HD   | 12(1.14)  | HTN & RA & CVA  | 19(1.65) | HTN & RA & CDD  | 30(1.36)  |
| 5                          | HTN & RA & CVA  | 11(1.04)  | HTN & RA & HD   | 19(1.65) | HTN & RA & CVA  | 30(1.36)  |
| 6                          | HTN & CDD & CBP | 11(1.04)  | HTN & HD & CVA  | 18(1.56) | HTN & CDD & CBP | 29(1.31)  |
| 7                          | HTN & RA & CBP  | 10(0.95)  | HTN & CDD & CBP | 18(1.56) | HTN & RA & DM   | 28(1.27)  |
| 8                          | HTN & CDD & HD  | 9(0.85)   | HTN & RA & HD   | 18(1.56) | HTN & RA & HD   | 28(1.27)  |

|    | CVA         |         | CBP        |          | CBP        |          |
|----|-------------|---------|------------|----------|------------|----------|
|    | HTN & CBP & |         | HTN & DM & |          | HTN & DM & |          |
| 9  | CVA         | 9(0.85) | CDD        | 17(1.48) | HD         | 27(1.22) |
|    | HTN & CVA & |         | HTN & DM & |          | HTN & RA & |          |
| 10 | EarD        | 8(0.76) | CVA        | 16(1.39) | HD         | 25(1.13) |

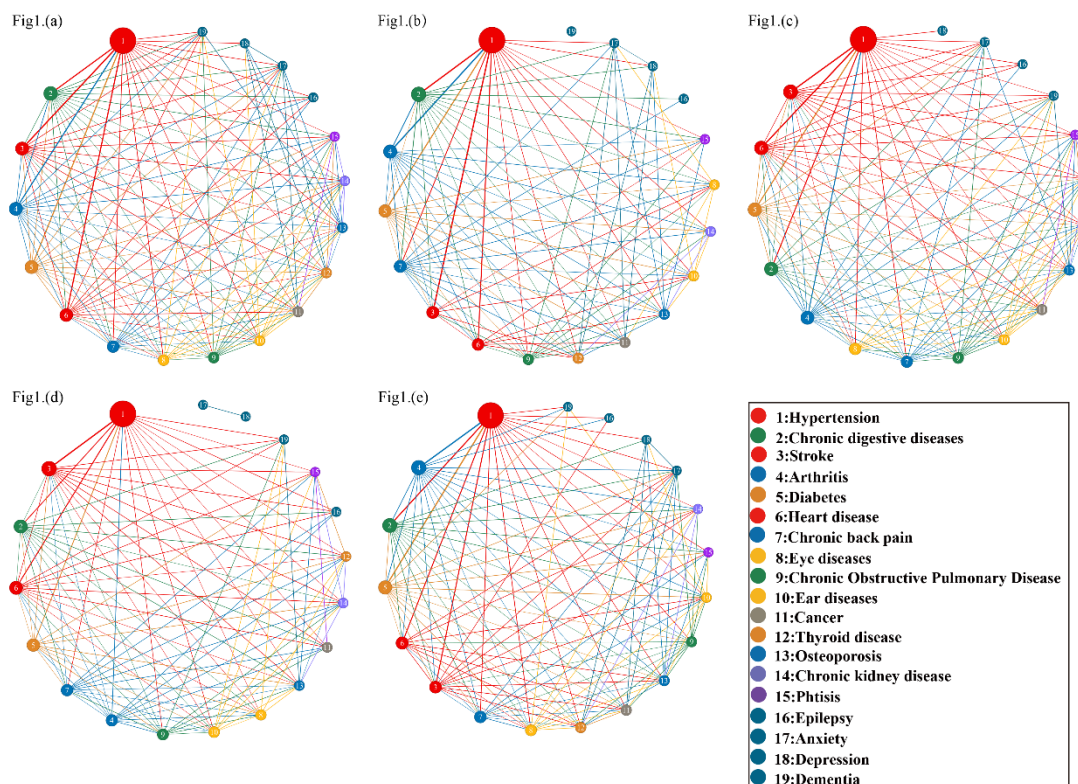

Fig.1 presents a network model diagram illustrating multimorbidity patterns across different age groups and genders: (a) overall population; (b) individuals aged 30-59 years; (c) individuals aged 60 years and above; (d) male population; and (e) female population.

## Discussion

In 2023, the prevalence of chronic diseases among individuals aged 30 years and older in rural northern China was 66.53%, and the multimorbidity rate was 32.47%. Hypertension (HTN) was the most common chronic disease, with a prevalence of 43.21%. The prevalence and multimorbidity rates were significantly higher among individuals aged 60 years and older compared to those aged 30-59 years, with no significant differences observed between genders. The combination of hypertension with other chronic diseases was common, particularly the

combinations of HTN & CVA, HTN & HD, and HTN & DM. These multimorbidity were prevalent across both genders and various age groups.

The prevalence of chronic diseases in this study (66.53%) was notably higher than that reported in the CHARLS study in China in 2018 (50.00%)<sup>[16]</sup>, in rural areas of Southwest China in 2021 (50.01%)<sup>[17]</sup>, and in rural Iran in 2019 (49.6%)<sup>[18]</sup>. Several factors may explain the increase in chronic disease prevalence in rural China in recent years. First, improved economic conditions and more refined diets, combined with limited health knowledge about scientific diets, have contributed to an imbalance between energy intake and expenditure, leading to increased rates of overweight and obesity <sup>[19, 20]</sup>. Second, mechanization has replaced traditional farming methods, and the widespread use of electronic devices has led to a significant reduction in physical activity and exercise<sup>[21]</sup>. Additionally, advancements in China's healthcare system and policies that increase medical insurance coverage for chronic diseases have extended life expectancy<sup>[22]</sup>. Finally, the inclusion of a broader range of chronic diseases in this study may also contribute to the higher prevalence rates. The prevalence of multimorbidity in rural China reported in this study was higher than that of the CHARLS study in China (31.53%)<sup>[23]</sup> but lower than global (37.2%) and Asian (35%) averages<sup>[24]</sup>. The prevalence of chronic diseases among adults aged 30-60 years in this study was 55.18%, indicating that this age group will likely be a major contributor to future multimorbidity growth in rural China. This finding suggests that multimorbidity is increasing rapidly in rural China and will likely contribute to a significant disease burden in these areas.

Various factors, including geographic environment, lifestyle, medical resource distribution, genetic background, and socioeconomic conditions<sup>[25]</sup>, influence the focus of multimorbidity studies across different countries and regions. For instance, in the United States, hyperlipidemia, hypertension, and diabetes mellitus are the main multimorbid conditions, underscoring the predominance of metabolic disease multimorbidity<sup>[26]</sup>. In France, alongside metabolic diseases, mental health conditions are also prevalent<sup>[27]</sup>. This study, however, included a broader range of chronic diseases, such as circulatory and metabolic disorders (e.g., hypertension, stroke, diabetes), as well as digestive, respiratory, musculoskeletal, and mental health conditions.



Hypertension was the most prevalent condition among individuals with multimorbidity in rural China, consistent with previous studies<sup>[28]</sup>. This may be associated with dietary habits, such as high salt intake, a carbohydrate-based diet, and insufficient consumption of fresh fruits and vegetables in rural northern China<sup>[29]</sup>. Hypertension, stroke, diabetes mellitus, and other cardiovascular and metabolic diseases were commonly observed as multimorbid conditions. Hypertension, in particular, was strongly linked to the onset of these diseases<sup>[30]</sup>, underscoring its critical role in chronic disease management<sup>[31]</sup>.

In this study, chronic disease multimorbidity was stratified by age and gender, with the most common dyad disease patterns among individuals aged 30–59 years being the combination of HTN with CDD, CVA, and RA. The high prevalence of CDD in this age group is closely related to irregular dietary habits, lack of exercise, high stress, and other factors. Especially since this region has a high prevalence of digestive tumors, such as esophageal cancer<sup>[32]</sup>, a possible genetic effect may be at play. The combination of CVA is consistent with its earlier onset, likely due to the high prevalence of risk factors such as hypertension, hyperlipidemia, obesity, and smoking in younger populations<sup>[33]</sup>. The combination of RA may be linked to the cold climate in northern rural areas, prolonged periods of insufficient sunlight, and a mono-diet leading to inadequate intake of calcium and other micronutrients<sup>[34]</sup>. In individuals over 60 years of age, the combination of HTN with CVA, HD, and DM is predominantly associated with the cumulative onset of age-related diseases, including circulatory and metabolic disorders<sup>[35, 36]</sup>. Among males, common dyad combinations include HTN with CVA, HD, and CDD. Smoking and excessive alcohol consumption have been identified as key behavioral risk factors for cardiovascular disease in men<sup>[37]</sup>. In contrast, the most frequent combinations among females are HTN with RA, DM, and CDD. Studies indicate that females are at higher risk of chronic diseases such as RA and DM compared to males<sup>[38, 39]</sup>, potentially due to the stronger influence of altered estrogen levels and psychosocial risk factors<sup>[40]</sup>.

The study provided comprehensive coverage of disease types and ensured the completeness of the data and the reliability of the findings. However, the representativeness of the data may be limited because the study was conducted exclusively in rural areas of a single province.

Nevertheless, the findings remain informative due to the similarities in demographics, age distribution, lifestyle habits, and the prevalence of chronic diseases between rural areas of Shanxi Province and other northern provinces in China. In addition, the study analyzed the effects of gender and age group on multimorbidity, but future research should consider the influence of other demographic characteristics, lifestyle factors, and physical examination variables on the combination of multimorbidity.

## **Conclusions**

---

This study reveals the severity of chronic diseases and multimorbidity among adults in rural areas of northern China, with hypertension identified as the most prevalent chronic condition contributing to multimorbidity. Various demographic groups exhibit distinct health characteristics, necessitating stratified, precise, and standardized management approaches. For instance, individuals aged 30-59 years should be managed for hypertension and chronic digestive diseases; those aged 60 years or older should receive management for hypertension alongside conditions like stroke, heart disease, and diabetes mellitus. Males should be monitored for hypertension and chronic digestive diseases, while females require management for hypertension and arthritis.

## **List of Abbreviations**

---

hypertension (HTN), stroke (CVA), heart disease (HD), arthritis (RA), chronic back pain (CBP), osteoporosis (OP), tuberculosis (TB), chronic lung disease (COPD), chronic digestive disease (CDD), diabetes mellitus (DM), thyroid disease (TD), eye disease (EyeD), ear disease (EarD), epilepsy (EP), anxiety (ANX), depression (MDD), dementia (DEM), chronic kidney disease (CKD), and cancer (CA), the International Physical Activity Questionnaire (IPAQ), Alcohol Use Disorders Identification Test (AUDIT).

## **Declarations**

## **Ethics approval and consent to participate**

---

The study was approved by the Ethics Committee of Harbin Medical University (NO. HMUIRB2022005PRE) before its commencement and conducted in accordance with the guidelines outlined in the Declaration of Helsinki. Informed consent was obtained from all participants before their involvement in the study.

### **Consent for publication**

---

Not applicable.

### **Availability of data and materials**

---

The data from Shanxi, China, needs to be obtained by sending a data request application to the corresponding author's email.

### **Competing interests**

---

The authors declare no competing interests.

### **Funding**

---

Chengzhi Medical College Doctoral Startup Fund, Grant/Award Number: 2024BS14.

### **Authors' Information**

---

Affiliations

School of Public Health, Shanxi Medical University, Taiyuan 030001, China.

ShuaiTang, Yanxing Li, Mei li Niu, Zijing Qi & Zhifang Li

Department of Prevention and Health Care, Affiliated Heping hospital of Changzhi medical college, Changzhi, 046000, China.

Tianyou Hao

Department of Public Health and Prevention, Changzhi Medical College, Changzhi 046000, China.

Hongmei Yang, Xiangxian Feng & Zhifang Li

The George Institute for Global Health, University of New South Wales, Australia.

Maoyi Tian

School of Medical Board, Shanxi Datong University, Datong 037009, China.

Maoyi Tian & Xinyi Zhang

### **Contributions**

S.T., L.Y. and Z.L.; methodology, M.T.,X.F. and Z.L.; software, S.T., L.Y. and Z.Q; validation, H.Y., Y.L., T.H., M.N., Z.Q and S.T.; investigation, Z.X., S.T., T.H., H.Y. and M.N.; resources, T.H., H.Y.; data curation, S.T. and Y.L.; writing—original draft preparation, S.T. and Y.L.; writing—review and editing, S.T., Y.L., Y.H.,X.Z, M.T., X.F. and Z.L.; visualization, T.H., Y.H. and F.X.; supervision, M.T., X.F. and Z.L.; project administration, X.F. and Z.L.; funding acquisition, Z.L. All authors have read and agreed to the published version of the manuscript.

### **Corresponding authors**

Correspondence to Zhifang Li.

### **References**

- 
- [1] CHEN X, GILES J, YAO Y, et al. The path to healthy ageing in China: a Peking University-Lancet Commission [J]. *Lancet*, 2022, 400(10367): 1967-2006.
  - [2] SKOU S T, MAIR F S, FORTIN M, et al. Multimorbidity [J]. *Nat Rev Dis Primers*, 2022, 8(1): 48.
  - [3] MERCER S, FURLER J, MOFFAT K, et al. Multimorbidity: technical series on safer primary care [M]. World Health Organization, 2016.
  - [4] ECONOMIC U N D O, AFFAIRS S. World population ageing 2019 [M]. UN, 2020.
  - [5] PINGPING W. Total population declines, but high-quality development of population achieves results [Z]. *China Economic Net*. 2024
  - [6] ZHANG X, PADHI A, WEI T, et al. Community prevalence and dyad disease pattern of multimorbidity in China and India: a systematic review [J]. *BMJ Glob Health*, 2022, 7(9): e008880.

- [7] NICHOLSON K, LIU W, FITZPATRICK D, et al. Prevalence of multimorbidity and polypharmacy among adults and older adults: a systematic review [J]. *Lancet Healthy Longev*, 2024, 5(4): e287-e296.
- [8] TRAN P B, KAZIBWE J, NIKOLAIDIS G F, et al. Costs of multimorbidity: a systematic review and meta-analyses [J]. *BMC Med*, 2022, 20(1): 234.
- [9] ZHANG L, WEI L, ZHANG W, et al. Bridging the gap: coordinating equity and efficiency in older people care resource allocation in China [J]. *BMC Geriatr*, 2024, 24(1): 165.
- [10] PATI S, HUSSAIN M A, SWAIN S, et al. Development and Validation of a Questionnaire to Assess Multimorbidity in Primary Care: An Indian Experience [J]. *Biomed Res Int*, 2016, 2016: 6582487.
- [11] WILSON J, TANUSEPUTRO P, MYRAN D T, et al. Characterization of Problematic Alcohol Use Among Physicians: A Systematic Review [J]. *JAMA Netw Open*, 2022, 5(12): e2244679.
- [12] FAN M, LYU J, HE P. Chinese guidelines for data processing and analysis concerning the International Physical Activity Questionnaire [J]. *Zhonghua liu xing bing xue za zhi= Zhonghua liuxingbingxue zazhi*, 2014, 35(8): 961-964.
- [13] CHINA N. Criteria of weight for adults (WS/T 428–2013) [Z]. Beijing: Standards Press of China. 2013
- [14] WHELTON P K, CAREY R M, ARONOW W S, et al. 2017 ACC/AHA/AAPA/ABC/ACPM/AGS/APhA/ASH/ASPC/NMA/PCNA Guideline for the Prevention, Detection, Evaluation, and Management of High Blood Pressure in Adults: A Report of the American College of Cardiology/American Heart Association Task Force on Clinical Practice Guidelines [J]. *Hypertension*, 2018, 71(6): e13-e115.
- [15] HU Y, WANG Z, HE H, et al. Prevalence and patterns of multimorbidity in China during 2002-2022: A systematic review and meta-analysis [J]. *Ageing Res Rev*, 2024, 93: 102165.
- [16] LIU B, TIAN Q, GUO J. Analysis of chronic diseases and comorbidities in middle-aged and elderly population in China [J]. *Med Soc*, 2022, 35(08): 58-61.
- [17] LIU L, WU X, LI H F, et al. Trends in the Prevalence of Chronic Non-Communicable Diseases and Multimorbidity across Socioeconomic Gradients in Rural Southwest China [J]. *J Nutr Health Aging*, 2023, 27(6): 457-462.

- [18] AHMADI A, SHIRANI M, KHALEDIFAR A, et al. Non-communicable diseases in the southwest of Iran: profile and baseline data from the Shahrekord PERSIAN Cohort Study [J]. BMC Public Health, 2021, 21(1): 2275.
- [19] ZHAO Z, ZHEN S, YAN Y, et al. Association of dietary patterns with general and central obesity among Chinese adults: a longitudinal population-based study [J]. BMC Public Health, 2023, 23(1): 1588.
- [20] REN Y, CASTRO CAMPOS B, PENG Y, et al. Nutrition Transition with Accelerating Urbanization? Empirical Evidence from Rural China [J]. Nutrients, 2021, 13(3).
- [21] DING C, SONG C, YUAN F, et al. The Physical Activity Patterns among Rural Chinese Adults: Data from China National Nutrition and Health Survey in 2010-2012 [J]. Int J Environ Res Public Health, 2018, 15(5).
- [22] HO I S, AZCOAGA-LORENZO A, AKBARI A, et al. Examining variation in the measurement of multimorbidity in research: a systematic review of 566 studies [J]. Lancet Public Health, 2021, 6(8): e587-e597.
- [23] ZHAO Y, ZHANG P, OLDENBURG B, et al. The impact of mental and physical multimorbidity on healthcare utilization and health spending in China: A nationwide longitudinal population-based study [J]. Int J Geriatr Psychiatry, 2021, 36(4): 500-510.
- [24] CHOWDHURY S R, CHANDRA DAS D, SUNNA T C, et al. Global and regional prevalence of multimorbidity in the adult population in community settings: a systematic review and meta-analysis [J]. EClinicalMedicine, 2023, 57: 101860.
- [25] ÁLVAREZ-GÁLVEZ J, ORTEGA-MARTÍN E, CARRETERO-BRAVO J, et al. Social determinants of multimorbidity patterns: A systematic review [J]. Front Public Health, 2023, 11: 1081518.
- [26] QUIÑONES A R, VALENZUELA S H, HUGUET N, et al. Prevalent Multimorbidity Combinations Among Middle-Aged and Older Adults Seen in Community Health Centers [J]. J Gen Intern Med, 2022, 37(14): 3545-3553.
- [27] COSTE J, VALDERAS J M, CARCAILLON-BENTATA L. Estimating and characterizing the burden of multimorbidity in the community: A comprehensive multistep analysis of two large nationwide representative surveys in France [J]. PLoS Med, 2021, 18(4): e1003584.

- [28] OFORI-ASENSO R, CHIN K L, CURTIS A J, et al. Recent Patterns of Multimorbidity Among Older Adults in High-Income Countries [J]. *Popul Health Manag*, 2019, 22(2): 127-137.
- [29] ZHAO R, ZHAO L, GAO X, et al. Geographic Variations in Dietary Patterns and Their Associations with Overweight/Obesity and Hypertension in China: Findings from China Nutrition and Health Surveillance (2015-2017) [J]. *Nutrients*, 2022, 14(19).
- [30] CAREY R M, WRIGHT J T, JR., TALER S J, et al. Guideline-Driven Management of Hypertension: An Evidence-Based Update [J]. *Circ Res*, 2021, 128(7): 827-846.
- [31] Multimorbidity patterns and associated factors in older Chinese: results from the China health and retirement longitudinal study [J]. *BMC Geriatr*, 2022, 22: 470.
- [32] NIU C, LIU Y, WANG J, et al. Risk factors for esophageal squamous cell carcinoma and its histological precursor lesions in China: a multicenter cross-sectional study [J]. *BMC Cancer*, 2021, 21(1): 1034.
- [33] YAHYA T, JILANI M H, KHAN S U, et al. Stroke in young adults: Current trends, opportunities for prevention and pathways forward [J]. *Am J Prev Cardiol*, 2020, 3: 100085.
- [34] HE Y S, WU Z D, WANG G H, et al. Impact of short-term exposure to ambient air pollution on osteoarthritis: a multi-city time-series analysis in Central-Eastern China [J]. *Environ Sci Pollut Res Int*, 2023, 30(47): 104258-104269.
- [35] CHEN J, ZHANG F, ZHANG Y, et al. Trajectories network analysis of chronic diseases among middle-aged and older adults: evidence from the China Health and Retirement Longitudinal Study (CHARLS) [J]. *BMC Public Health*, 2024, 24(1): 559.
- [36] KHANOLKAR A R, CHATURVEDI N, KUAN V, et al. Socioeconomic inequalities in prevalence and development of multimorbidity across adulthood: A longitudinal analysis of the MRC 1946 National Survey of Health and Development in the UK [J]. *PLoS Med*, 2021, 18(9): e1003775.
- [37] HE L, LA Y, YAN Y, et al. The prevalence and burden of four major chronic diseases in the Shanxi Province of Northern China [J]. *Front Public Health*, 2022, 10: 985192.
- [38] WANG X H, LIN J N, LIU G Z, et al. Women Are at a Higher Risk of Chronic Metabolic Diseases Compared to Men With Increasing Body Mass Index in China [J]. *Front Endocrinol (Lausanne)*, 2020, 11: 127.

- [39] ROMO-GARCÍA M F, ZAPATA-ZUÑIGA M, ENCISO-MORENO J A, et al. The role of estrogens in rheumatoid arthritis pathophysiology [J]. *Rheum Arthritis—Other Perspectives Towards a Better Practice*, 2020, 27.
- [40] KAUTZKY-WILLER A, LEUTNER M, HARREITER J. Sex differences in type 2 diabetes [J]. *Diabetologia*, 2023, 66(6): 986-1002.
